1 **Genome-scale genetic interactions position the Mitotic Exit Network as a major**  
2 **antagonist of transient Topoisomerase II deficiency.**

3 Cristina Ramos-Pérez<sup>1,2,#</sup>, Jessel Ayra-Plasencia<sup>1,2</sup>, Emiliano Matos-Perdomo<sup>1,2</sup>, Michael  
4 Lisby<sup>3</sup>, Grant W Brown<sup>4</sup> and Félix Machín<sup>1,\*</sup>

5

6 <sup>1</sup> Unidad de Investigación, Hospital Universitario Nuestra Señora de Candelaria, Ctra del  
7 Rosario 145, 38010, Santa Cruz de Tenerife, Spain.

8 <sup>2</sup> Universidad de la Laguna, San Cristóbal de La Laguna, Santa Cruz de Tenerife, Spain.

9 <sup>3</sup> Department of Biology, University of Copenhagen, Ole Maaloesvej 5, DK-2200  
10 Copenhagen N, Denmark.

11 <sup>4</sup> Department of Biochemistry and Donnelly Centre, University of Toronto, Toronto, Ontario,  
12 M5S3E1, Canada.

13 <sup>#</sup> Present address: Department of Biochemistry and Donnelly Centre, University of Toronto,  
14 Toronto, Ontario, M5S3E1, Canada.

15 \* Corresponding author:

16 Félix Machín. Unidad de Investigación, Hospital Universitario Nuestra Señora de la  
17 Candelaria, Ctra del Rosario 145, 38010 Santa Cruz de Tenerife, Spain. E-mail:

18 [fmachin@funcanis.org](mailto:fmachin@funcanis.org)

19

20

## 1 **Abstract**

2 Topoisomerase II (Top2) is the essential protein that resolves DNA catenations. When the  
3 Top2 is inactivated, mitotic catastrophe results from massive entanglement of chromosomes.  
4 Top2 is also the target of many first-line anticancer drugs, the so-called Top2 poisons. Often,  
5 tumours become resistant to these drugs by downregulating Top2. Here, we have compared  
6 two isogenic yeast strains carrying *top2* thermosensitive alleles that differ in their resistance  
7 to Top2 poisons, the broadly-used poison-sensitive *top2-4* and the poison-resistant *top2-5*.  
8 We found that *top2-5* transits through anaphase faster than *top2-4*. In order to define the  
9 biological importance of this difference, we performed genome-scale Synthetic Gene Array  
10 (SGA) analyses during chronic sublethal Top2 downregulation and acute, yet transient, Top2  
11 inactivation. We find that downregulation of cell cycle progression, especially the Mitotic  
12 Exit Network (MEN), protects against Top2 deficiency. In all conditions, genetic protection  
13 was stronger in *top2-5*, and this correlated with destabilization of anaphase bridges by  
14 execution of MEN. We suggest that mitotic exit may be a therapeutic target to hypersensitize  
15 cancer cells carrying downregulating mutations in *TOP2*.

16

17 **Keywords:** Topoisomerase II, *top2-4*, *top2-5*, Synthetic Gene Array Analysis, Mitotic Exit  
18 Network, Anaphase bridges, Cdc15, Cdc14, Dpb11

## 1 INTRODUCTION

2 Upon chromosome replication, topological intertwining arises between sister chromatids.  
3 These intertwines often become interlocked (i.e. catenations) due to the confinement of the  
4 very long chromosomes in the reduced space of the nucleus. Catenations preclude sister  
5 chromatid segregation at anaphase, and the key enzyme in all life forms for removing them is  
6 topoisomerase II (Top2) (Nitiss 2009a; Vos et al. 2011). Top2 works by making transient  
7 double-strand breaks (DSBs) on one sister chromatid, allowing the passage of the sister  
8 through it. Importantly, a human homologue of Top2, hTOPOII $\alpha$ , is the main target of first-  
9 line anticancer drugs including etoposide and doxorubicin (Deweese and Osheroff 2009;  
10 Nitiss 2009b). These drugs trap Top2-mediated DSBs and are so called Top2 poisons. The  
11 resulting DSBs are more abundant and less efficiently repaired in cancer cells than in normal  
12 cells and this, in turn, leads to the selective killing of the tumour. The hTOPOII $\alpha$  is often  
13 mutated and/or downregulated during acquisition of secondary resistance to Top2 poisons,  
14 and this fact could be exploited for second-line anticancer treatments (Nitiss 2009b; Holohan  
15 et al. 2013; Larsen, Escargueil, and Skladanowski 2003).

16 Top2 is essential for cellular viability. In unicellular eukaryotes and bacteria the study of  
17 Top2 functions has been largely facilitated by the availability of conditional alleles. In the  
18 yeasts *Saccharomyces cerevisiae* and *Schizosaccharomyces pombe* early studies showed that  
19 inactivation of Top2 by means of thermosensitive (ts) alleles leads to a mitotic catastrophe as  
20 determined by a sudden loss of viability once the cells reach anaphase (Uemura and Tanagida  
21 1986; Holm et al. 1985). In agreement with a role in removing sister chromatid catenations,  
22 Top2 inactivation yielded cells with DAPI-stained anaphase bridges and broken  
23 chromosomes once cells completed cytokinesis (Uemura and Tanagida 1986; Holm et al.

1 1985; Uemura and Yanagida 1984; DiNardo, Voelkel, and Sternglanz 1984; Holm, Stearns,  
2 and Botstein 1989). In the case of *S. cerevisiae*, all these studies were carried out with two ts  
3 alleles isolated in independent screens, *top2-1* and *top2-4*. Both alleles yield Top2-ts proteins  
4 sensitive to poisons. In the same screen where *top2-4* was isolated, *top2-5* was also obtained  
5 (Holm et al. 1985). Later, *top2-5* was shown to be resistant to poisons and served as a key  
6 tool to understand the mechanism of action of this class of clinical drugs (Jannatipour, Liu,  
7 and Nitiss 1993; Perego et al. 2000). Nevertheless, the *top2-5* cell cycle was not characterized  
8 and has been assumed to be equivalent to that of *top2-4*.

9 Here, we have revisited the cell cycle progression of cells expressing the broadly used  
10 *top2-4* allele and compared its behaviour to an isogenic *top2-5* strain. In addition, we have  
11 performed a genome-scale synthetic genetic array (SGA) analysis for these two *top2-ts*  
12 alleles. We show that execution of the Mitotic Exit Network has specific deleterious effects  
13 on sublethal downregulation of Top2-5.

14

## 1 RESULTS AND DISCUSSION

### 2 Cells carrying the *top2-5* allele complete anaphase faster than *top2-4*.

3 We started this work by revisiting fluorescence microscopy time course experiments  
4 in the original *top2-4* and *top2-5* ts strains (Holm et al. 1985). As a control, we also included  
5 the *TOP2* reference wild type allele in the same genetic background. We first engineered the  
6 strains in order to label the histone H2A (*HTA2* gene) with GFP. This strategy allowed us to  
7 complement the time course experiments with fluorescence videomicroscopy of the nuclear  
8 DNA without adding DNA intercalating dyes. We further labelled Rad52 with RedStar2 in  
9 order to detect whether cells suffered DNA damage upon inactivation of Top2. Rad52 forms  
10 nuclear foci to repair DSBs through the homologous recombination repair pathway (Lisby,  
11 Rothstein, and Mortensen 2001).

12 All strains were arrested in G1 at the permissive temperature (25 °C) for 3 hours and  
13 then released at 37 °C to follow the progression through a synchronous cell cycle with Top2-  
14 ts inactivated. As expected, the *TOP2* control cycled normally after the release, with normal  
15 segregation of the nuclear masses (i.e., long-distance binucleated, LDB) taking place very  
16 quickly at 90'-120' and no signs of DNA damage after that (Figure 1a, left panels). By  
17 contrast, the *top2-4* mutant exhibited a phenotype of cells stuck in anaphase/telophase after 4  
18 hours, in which approximately 70% of the cells were in a “dumbbell” state (i.e., the bud as  
19 big as the mother) and about 35% had two very close split nuclear masses (i.e., short-distance  
20 binucleated, SDB) as determined by histone-labelling (Figure 1a, central panels). The  
21 presence of this abnormal form of nuclear segregation was constant from 150' onward.  
22 Interestingly, the same SDB phenotype was described before for a strain that depletes Top2

1 through a degron system and referred as “cut” phenotype (Baxter and Diffley 2008). Besides,  
2 a similar terminal phenotype occurs in mouse topo II $\alpha^{-/-}$  embryos and in a significant fraction  
3 (~1/3) of epithelial cells treated with Top2 catalytic inhibitors (Akimitsu et al. 2003;  
4 Wheatley, O’Connell, and Wang 1998). Coinciding with this change in the nuclear  
5 morphology, a steady increase of cells with Rad52 foci was also observed (up to 35% of cells  
6 by 240’). Strikingly, *top2-5* had a very different mix of cell morphologies, which included a  
7 decrease of the dumbbell category from 150’ and the presence of “threesomes”, where the  
8 mother cell has re-budded, in up to 25% of the population (Figure 1a, right panels).  
9 Furthermore, there was only a transient peak of SDB at 120’, with less than 10% of the cells  
10 having the SDB morphology after 4 hours. Likewise, Rad52 foci abruptly rose from 120’,  
11 reaching 60% of all cells by 180’ (twice as many as in *top2-4*).

12 An unexpected pattern observed in the time course experiments with H2A-GFP was  
13 the relative low frequency of chromatin anaphase bridges (i.e., stretched histone-labelled  
14 DNA across the bud neck) in both *top2-ts* mutants (Figure 1a, lower panels). Instead, the  
15 above-mentioned SDB was the distinctive pattern of *top2-ts* relative to *TOP2*, especially in  
16 *top2-4*. In order to shed more light on this phenotype, we filmed cells growing  
17 asynchronously and focused on those cells close to reaching anaphase. We observed that all  
18 *TOP2* and most *top2-5* cells quickly divide and fully segregate the two nuclear masses to the  
19 daughter cell poles (Figure 1b, upper series). By contrast, in the case of *top2-4* we often  
20 observed long-lasting histone-labelled SDB cells. Interestingly, this nuclear phenotype was  
21 rather dynamic and sometimes became a genuine chromatin bridge during filming (Figure 1b,  
22 lower series). To confirm that SDB was a proper split of nuclear masses, we took samples  
23 and stained the DNA with DAPI. In all cases, including the SDB phenotype, the DAPI-

1 stained signal overlapped with the H2A-GFP (Figure 1c). These observations indicate that  
2 anaphase bridges and SDB are dynamically exchangeable. In the case of *top2-5 HTA2-GFP*,  
3 where we observed neither chromatin bridges nor SDBs during the time course and the  
4 movies, further labelling with the ultrafine bridge (UFB) marker Dpb11 (Chan, North, and  
5 Hickson 2007; Germann et al. 2014), as well as the DNA and plasma membrane reporter  
6 Hoechst 33258, showed that there were very few chromatin bridges (8% [4% - 14%]) or  
7 UFBs (3% [1% - 8%]) connecting the split nuclear masses in LDB cells. Furthermore, the  
8 pre-abscission/post-abscission ratio (1:4) supports the conclusion that most LDB cells have  
9 completed cytokinesis (Figure 1d).

10 Finally, the use of live cell imaging also allowed us to visualize other striking  
11 phenotypes that took hours to develop. Although these phenotypes occurred in less than 10%  
12 of the cells, they were significant in that they demonstrate the uncoupling of nuclear division  
13 and the cell cycle in *top2-ts* (e.g., rebudding before splitting the chromatin bridge) (Figure  
14 S1).

15

## 16 **Synthetic genetic array analysis reveals mitotic exit and cytokinesis as deleterious** 17 **enhancers of transient Top2 inactivation.**

18 The prevalence of the dynamic SDB phenotype in *top2-4* relative to *top2-5* raised, in  
19 turn, the question of why this difference occurred. In order to search for players that may  
20 influence the different behaviours of the *top2* alleles, and to define its biological  
21 consequence, we carried out a synthetic genetic array (SGA) analysis with two collections of  
22 yeast mutants: the haploid gene deletion collection of non-essential genes (4322 knockout

1 strains) and a collection of *ts* alleles for essential genes (1231 *ts* strains) (Li et al. 2011; Tong  
2 et al. 2001; Giaever et al. 2002). SGA allows screening for genetic interactions in  
3 *Saccharomyces cerevisiae* by comparing the fitness of the colonies of all the different mutant  
4 combinations (i.e., single *top2-ts* mutants vs single mutants in the collections vs double *top2-*  
5 *ts*/collection mutants). In addition, we decided to perform the SGA analysis in three different  
6 conditions that modify Top2 activity.

7 In our first analysis, we grew all the strains constantly at the permissive temperature  
8 (25°C), and compared the collection of *top2-4* and *top2-5* double mutants with the  
9 corresponding *TOP2* counterparts as references. Thermosensitive alleles are expected to have  
10 mild reduced fitness at permissive temperatures and, in our case, we indeed detected genetic  
11 interactions at 25 °C, 139 in *top2-4* and 167 in *top2-5* (Figure 2a, Tables S1 & S2). Eighty-  
12 four interactions were shared between *top2-4* and *top2-5*, and these interacted with both  
13 alleles in a similar way, either positively or negatively (Figure 2b, Table S3). Among them  
14 was *top1Δ*, which is well known to have synthetic sickness with *top2-ts* alleles (Kim and  
15 Wang 1989). However, most of the observed genetic interactions were positive, which is  
16 typically a sign of suppressive pathways.

17 Next, we sought to study the changes that increasing the temperature would produce  
18 in the observed genetic interactions. We opted for two different incubations: one set of arrays  
19 was grown at semipermissive temperature (30°C) for 2 days, and another set was incubated at  
20 37°C for 6 hours (i.e, enough to complete one cell cycle without Top2 on solid media), and  
21 then shifted to 25°C to allow growth of survivors. In both cases we used the *top2-ts* arrays  
22 that were grown at 25°C as controls to compare the colony size. Thus, we obtained a large  
23 number of new interactions that, unlike during growth at 25°C, were mostly negative (Figure



1 [2c, Tables S4 & S5](#)). Ontological classification of significant interactions revealed common  
2 negative interactions at 37°C x 6h with bioenergetics and autophagy ([Table 1](#)). This could be  
3 related to the heat shock treatment and putative roles of Top2 during chromosome reshape  
4 and transcription reprogramming to cope with this stress ([Pommier et al. 2016](#)). Importantly,  
5 this classification also spotlighted a high number of positive interactions between *top2-5*  
6 grown at 30°C and/or 37°C x 6h and thermosensitive alleles related to anaphase/telophase  
7 progression ([Figure 2d, Table 1](#)). Many of the genes belong to the Mitotic Exit Network  
8 (MEN), such as *CDC14* and *CDC15*, whereas others are related to the cytoskeleton or the  
9 ribosomal DNA (rDNA) metabolism, which are known to undergo important modifications  
10 during anaphase ([Machín et al. 2016](#)). To a lesser extent, *top2-4* was also enriched in mitotic  
11 division alleles when incubated at 37°C x 6h, some of which overlap with those of *top2-5*  
12 (e.g. *STU1*, *CDC10* and *MOB2*) ([Tables S4 & S5](#)).

13

#### 14 **Anaphase bridges in *top2-ts* are stabilized by preventing mitotic exit.**

15 Since MEN and cytokinesis defects were the clearest positive genetic interactions  
16 with *top2-ts*, we tested the consequence of disrupting MEN/cytokinesis in the original *top2-ts*  
17 strains.

18 We constructed *top2-5 cdc15-2* and *top2-5 cdc14-1* double ts mutants and arrested  
19 these strains in telophase, together with the corresponding *TOP2 cdc15-2/cdc14-1* controls.  
20 We found that *top2-5 cdc15-2* could not resolve the histone-labelled anaphase bridge (89%  
21 [84%-93%] dumbbells with clearly visible chromatin bridges at 240'; one-third of them  
22 having a “short-distance” chromatin bridge phenotype, one-third having a “long-distance”

1 chromatin bridge, and another one-third having a complex string structure) (Figure 3a). By  
2 contrast, full segregation (96% [93%-98%]) of the histone signal was seen in all *TOP2*  
3 *cdc15-2* cells. In the case of *top2-5 cdc14-1*, the nuclear segregation was worse; we observed  
4 that most of the nucleus was in the bud (Figure 3b; 84% [77%-90%]). Taking into account  
5 that *cdc14-1* strains are known to form an anaphase bridge that comprises the rDNA and also  
6 tend to mistakenly segregate the nucleus to the daughter cell (Machín et al. 2005; Machín et  
7 al. 2016; Ross and Cohen-Fix 2004), the synergistic nuclear segregation defect in *top2-5*  
8 *cdc14-1* is not that surprising. Remarkably, this highly asymmetric segregation is the  
9 hallmark of mammal epithelial cells treated with Top2 catalytic inhibitors (Gorbsky 1994;  
10 Wheatley, O'Connell, and Wang 1998). Overall, these two double mutants demonstrate that  
11 the *top2-5* strain gives rise to actual chromatin bridges and that the contraction of the  
12 cytokinetic furrow, or an alternative MEN-mediated activity, can quickly split this bridge  
13 apart.

14 We also made a *top2-4 cdc15-aid* strain. We used *cdc15-aid* (Cdc15 depletion by  
15 auxin addition rather than temperature shift) because it was difficult to phenotypically  
16 confirm *top2-4 cdc15-2* as *top2-4* alone arrested in telophase (Figure 1a). We also observed  
17 chromatin bridges when both Top2-4 and Cdc15-aid were depleted (33% [24%-43%]). In this  
18 case, most chromatin bridges had a SDB-like appearance (Figure 3c).

19

## 20 **Conclusions and perspectives.**

21 In this work, we have characterized the consequences of depleting yeast cells of Top2  
22 using two *top2-ts* alleles that differ in their resistance to chemotherapeutic Top2 poisons. As

1 previously reported, the first cell cycle takes place with normal kinetics until anaphase, when  
2 *top2-ts* form anaphase bridges. We have shown that *top2-5* (poison-resistant) splits apart this  
3 bridge more quickly than *top2-4* (poison-sensitive) and is more susceptible to the execution  
4 of mitotic exit. Our results point towards upregulation of mitotic exit and/or cytokinesis as  
5 new putative targets to synergistically promote cell death upon Top2  
6 downregulation/mutation in cancer cells.

7

## 1 MATERIALS AND METHODS

### 2 Yeast strain construction, cell cycle experiments and fluorescence microscopy.

3 All the strains used in this work are listed in [Table S6](#) together with their relevant  
4 genotypes. C-terminal tagging with GFP/RFP variants or auxin-based degron system, gene  
5 deletions and ts allele transfers were made using standard PCR methods as described before  
6 ([Tong et al. 2001](#); [Janke et al. 2004](#); [Nishimura et al. 2009](#)).

7 Cell cycle time course experiments and fluorescence microscopy were performed as  
8 described before ([Quevedo et al. 2012](#); [García-Luis and Machín 2014](#); [Silva et al. 2012](#)).

9 DNA was stained using DAPI (Sigma-Aldrich) at 4 µg/ml final concentration after keeping  
10 the cell pellet 24h at -20°C. Plasma membrane was stained with 5 µg/ml Hoechst 33258  
11 (Sigma-Aldrich) for 15 min at 37°C before processing for fluorescence microscopy. For the  
12 time-lapse movies, an asynchronous culture was concentrated by centrifugation to 3 OD<sub>600</sub>  
13 equivalents and plated on YPDA (YPD, agar 2% w/v). Patches were made from this plate and  
14 mounted on a microscope slide. They were incubated at 37°C in high humidity chambers to  
15 avoid drying of the agarose patch.

16 95% confidence intervals for proportions of selected cell phenotypes were calculated  
17 assuming a binomial distribution and are indicated in the main text between brackets.

### 18 Synthetic genetic array analyses

19 Synthetic genetic array (SGA) was performed as described before ([Li et al. 2011](#);  
20 [Tong et al. 2001](#)). In order to make the strain arrays (described in detail in [Figure S2](#)), we  
21 first replaced the *TOP2* locus in the haploid *MAT $\alpha$*  strain Y7092 with our query *top2-ts*

1 alleles attached to the selection marker *natMX4* (resistance to nourseothricin). For  
2 consistency, we also attached the *natMX4* marker to our reference *TOP2* Y7092 strain. The  
3 new *natMX4* strains were then mated with the *MATa* mutant collections (4322 knockout  
4 strains for non-essential genes plus 1231 strains with thermosensitive alleles for essential  
5 genes.). These panels of *MATa* strains bear the *kanMX4* marker (resistance to G418) at the  
6 mutated loci. Diploids were selected on YPD plates containing both nourseothricin and G418,  
7 and later sporulated and selected for *MATa* haploids containing both markers. Once the  
8 *TOP2*, *top2-4* and *top2-5* arrays were constructed they were replicated onto plates with the  
9 same medium used in the *MATa* selection and exposed to the different temperature regimes  
10 described in the Results section.

11 The image analysis, processing and fitness scoring of the arrays were done using  
12 SGAtools (<http://sgatools.cabr.utoronto.ca/about>) (Wagih et al. 2013). Gene Ontology (GO)  
13 enrichment analysis was performed using the Generic Gene Ontology Term Finder  
14 (<http://go.princeton.edu/cgi-bin/GOTermFinder>) of Princeton University (Boyle et al. 2004).  
15 Networks were made with Cytoscape v3.3.0 (<http://www.cytoscape.org/cy3.html>) (Shannon  
16 et al. 2003).

## 1 **ACKNOWLEDGMENTS**

2           We thank other members of the labs for fruitful discussions and help.

3           This work was supported by the research grants PI12/00280 and BFU2015-63902-R  
4 to FM. These grants were funded by the Spanish “Instituto de Salud Carlos III” and the  
5 Spanish Ministry of Economy and Competitiveness, respectively. Agencia Canaria de  
6 Investigación, Innovación y Sociedad de la Información supported CR through a predoctoral  
7 fellowship (TESIS20120109). All these programs were co-financed with the European  
8 Commission's ERDF structural funds. The Danish Agency for Science, Technology and  
9 Innovation (DFF) and the Villum Foundation supported the work performed by ML. Funding  
10 to GWB was provided by the Canadian Cancer Society Research Institute (Impact grant  
11 702310) and the Canadian Institutes of Health Research (grant MOP-79368).

12           The authors declare no conflicts of interest.

## 1 REFERENCES

- 2 Akimitsu, Nobuyoshi, Noritaka Adachi, Hiroshi Hirai, Muktadir S Hossain, Hiroshi  
3 Hamamoto, Masao Kobayashi, Yasuaki Aratani, Hideki Koyama, and Kazuhisa  
4 Sekimizu. 2003. “Enforced Cytokinesis without Complete Nuclear Division in  
5 Embryonic Cells Depleting the Activity of DNA Topoisomerase IIalpha.” *Genes to*  
6 *Cells : Devoted to Molecular & Cellular Mechanisms* 8 (4): 393–402.
- 7 Baxter, Jonathan, and John F X Diffley. 2008. “Topoisomerase II Inactivation Prevents the  
8 Completion of DNA Replication in Budding Yeast.” *Molecular Cell* 30 (6): 790–802.  
9 doi:10.1016/j.molcel.2008.04.019.
- 10 Boyle, Elizabeth I, Shuai Weng, Jeremy Gollub, Heng Jin, David Botstein, J Michael Cherry,  
11 and Gavin Sherlock. 2004. “GO::TermFinder--Open Source Software for Accessing  
12 Gene Ontology Information and Finding Significantly Enriched Gene Ontology Terms  
13 Associated with a List of Genes.” *Bioinformatics (Oxford, England)* 20 (18): 3710–15.  
14 doi:10.1093/bioinformatics/bth456.
- 15 Chan, Kok-Lung, Phillip S North, and Ian D Hickson. 2007. “BLM Is Required for Faithful  
16 Chromosome Segregation and Its Localization Defines a Class of Ultrafine Anaphase  
17 Bridges.” *The EMBO Journal* 26 (14): 3397–3409. doi:10.1038/sj.emboj.7601777.
- 18 Deweese, J. E., and N. Osheroff. 2009. “The DNA Cleavage Reaction of Topoisomerase II:  
19 Wolf in Sheep’s Clothing.” *Nucleic Acids Research* 37 (3): 738–48.  
20 doi:10.1093/nar/gkn937.
- 21 DiNardo, S, K Voelkel, and R Sternglanz. 1984. “DNA Topoisomerase II Mutant of  
22 *Saccharomyces Cerevisiae*: Topoisomerase II Is Required for Segregation of Daughter  
23 Molecules at the Termination of DNA Replication.” *Proceedings of the National*  
24 *Academy of Sciences of the United States of America* 81 (9): 2616–20.
- 25 García-Luis, Jonay, and Félix Machín. 2014. “Mus81-Mms4 and Yen1 Resolve a Novel  
26 Anaphase Bridge Formed by Noncanonical Holliday Junctions.” *Nature*  
27 *Communications* 5 (January): 5652. doi:10.1038/ncomms6652.
- 28 Germann, Susanne M., Vera Schramke, Rune Troelsgaard Pedersen, Irene Gallina, Nadine  
29 Eckert-Boulet, Vibe H. Oestergaard, and Michael Lisby. 2014. “TopBP1/Dpb11 Binds  
30 DNA Anaphase Bridges to Prevent Genome Instability.” *Journal of Cell Biology* 204  
31 (1): 45–59. doi:10.1083/jcb.201305157.
- 32 Giaever, Guri, Angela M Chu, Li Ni, Carla Connelly, Linda Riles, Steeve Véronneau, Sally  
33 Dow, et al. 2002. “Functional Profiling of the *Saccharomyces Cerevisiae* Genome.”  
34 *Nature* 418 (6896): 387–91. doi:10.1038/nature00935.
- 35 Gorbsky, G J. 1994. “Cell Cycle Progression and Chromosome Segregation in Mammalian  
36 Cells Cultured in the Presence of the Topoisomerase II Inhibitors ICRF-187 [(+)-1,2-  
37 bis(3,5-Dioxopiperazinyl-1-Yl)propane; ADR-529] and ICRF-159 (Razoxane).” *Cancer*  
38 *Research* 54 (4): 1042–48.
- 39 Holm, C, T Goto, J C Wang, and D Botstein. 1985. “DNA Topoisomerase II Is Required at  
40 the Time of Mitosis in Yeast.” *Cell* 41 (2): 553–63.
- 41 Holm, C, T Stearns, and D Botstein. 1989. “DNA Topoisomerase II Must Act at Mitosis to  
42 Prevent Nondisjunction and Chromosome Breakage.” *Molecular and Cellular Biology* 9

- 1 (1): 159–68.
- 2 Holohan, Caitriona, Sandra Van Schaeybroeck, Daniel B Longley, and Patrick G Johnston.  
3 2013. “Cancer Drug Resistance: An Evolving Paradigm.” *Nature Reviews. Cancer* 13  
4 (10): 714–26. doi:10.1038/nrc3599.
- 5 Janke, Carsten, Maria M Magiera, Nicole Rathfelder, Christof Taxis, Simone Reber, Hiromi  
6 Maekawa, Alexandra Moreno-Borchart, et al. 2004. “A Versatile Toolbox for PCR-  
7 Based Tagging of Yeast Genes: New Fluorescent Proteins, More Markers and Promoter  
8 Substitution Cassettes.” *Yeast (Chichester, England)* 21 (11): 947–62.  
9 doi:10.1002/yea.1142.
- 10 Jannatipour, M, Y X Liu, and J L Nitiss. 1993. “The top2-5 Mutant of Yeast Topoisomerase  
11 II Encodes an Enzyme Resistant to Etoposide and Amsacrine.” *The Journal of*  
12 *Biological Chemistry* 268 (25): 18586–92.
- 13 Kim, R A, and J C Wang. 1989. “A Subthreshold Level of DNA Topoisomerases Leads to  
14 the Excision of Yeast rDNA as Extrachromosomal Rings.” *Cell* 57 (6): 975–85.
- 15 Larsen, Annette K, Alexandre E Escargueil, and Andrzej Skladanowski. 2003. “Catalytic  
16 Topoisomerase II Inhibitors in Cancer Therapy.” *Pharmacology & Therapeutics* 99 (2):  
17 167–81. doi:10.1016/S0163-7258(03)00058-5.
- 18 Li, Zhijian, Franco J Vizeacoumar, Sondra Bahr, Jingjing Li, Jonas Warringer, Frederick S  
19 Vizeacoumar, Renqiang Min, et al. 2011. “Systematic Exploration of Essential Yeast  
20 Gene Function with Temperature-Sensitive Mutants.” *Nature Biotechnology* 29 (4):  
21 361–67. doi:10.1038/nbt.1832.
- 22 Lisby, M, R Rothstein, and U H Mortensen. 2001. “Rad52 Forms DNA Repair and  
23 Recombination Centers during S Phase.” *Proceedings of the National Academy of*  
24 *Sciences of the United States of America* 98 (15): 8276–82.  
25 doi:10.1073/pnas.121006298.
- 26 Machín, Félix, Oliver Quevedo, Cristina Ramos-Pérez, and Jonay García-Luis. 2016. “Cdc14  
27 Phosphatase: Warning, No Delay Allowed for Chromosome Segregation!” *Current*  
28 *Genetics* 62 (1): 7–13. doi:10.1007/s00294-015-0502-1.
- 29 Machín, Félix, Jordi Torres-Rosell, Adam Jarmuz, and Luis Aragón. 2005. “Spindle-  
30 Independent Condensation-Mediated Segregation of Yeast Ribosomal DNA in Late  
31 Anaphase.” *The Journal of Cell Biology* 168 (2): 209–19. doi:10.1083/jcb.200408087.
- 32 Nishimura, Kohei, Tatsuo Fukagawa, Haruhiko Takisawa, Tatsuo Kakimoto, and Masato  
33 Kanemaki. 2009. “An Auxin-Based Degron System for the Rapid Depletion of Proteins  
34 in Nonplant Cells.” *Nature Methods* 6 (12). Nature Publishing Group: 917–22.  
35 doi:10.1038/nmeth.1401.
- 36 Nitiss, John L. 2009a. “DNA Topoisomerase II and Its Growing Repertoire of Biological  
37 Functions.” *Nature Reviews. Cancer* 9 (5): 327–37. doi:10.1038/nrc2608.
- 38 ———. 2009b. “Targeting DNA Topoisomerase II in Cancer Chemotherapy.” *Nature*  
39 *Reviews. Cancer* 9 (5): 338–50. doi:10.1038/nrc2607.
- 40 Perego, P, G S Jimenez, L Gatti, S B Howell, and F Zunino. 2000. “Yeast Mutants as a  
41 Model System for Identification of Determinants of Chemosensitivity.”  
42 *Pharmacological Reviews* 52 (4): 477–92.



- 1 Pommier, Yves, Yilun Sun, Shar-yin N. Huang, and John L. Nitiss. 2016. “Roles of  
2 Eukaryotic Topoisomerases in Transcription, Replication and Genomic Stability.”  
3 *Nature Reviews Molecular Cell Biology*. Nature Publishing Group.  
4 doi:10.1038/nrm.2016.111.
- 5 Quevedo, Oliver, Jonay García-Luis, Emiliano Matos-Perdomo, Luis Aragón, and Félix  
6 Machín. 2012. “Nondisjunction of a Single Chromosome Leads to Breakage and  
7 Activation of DNA Damage Checkpoint in g2.” Edited by Soni Lacefield. *PLoS*  
8 *Genetics* 8 (2). Public Library of Science: e1002509. doi:10.1371/journal.pgen.1002509.
- 9 Ross, Karen E, and Orna Cohen-Fix. 2004. “A Role for the FEAR Pathway in Nuclear  
10 Positioning during Anaphase.” *Developmental Cell* 6 (5): 729–35.
- 11 Shannon, Paul, Andrew Markiel, Owen Ozier, Nitin S Baliga, Jonathan T Wang, Daniel  
12 Ramage, Nada Amin, Benno Schwikowski, and Trey Ideker. 2003. “Cytoscape: A  
13 Software Environment for Integrated Models of Biomolecular Interaction Networks.”  
14 *Genome Research* 13 (11): 2498–2504. doi:10.1101/gr.1239303.
- 15 Silva, Sonia, Irene Gallina, Nadine Eckert-Boulet, and Michael Lisby. 2012. “Live Cell  
16 Microscopy of DNA Damage Response in *Saccharomyces Cerevisiae*.” *Methods in*  
17 *Molecular Biology (Clifton, N.J.)* 920: 433–43. doi:10.1007/978-1-61779-998-3\_30.
- 18 Tong, A. H. Y., M Evangelista, A B Parsons, H Xu, G D Bader, N Pagé, M Robinson, et al.  
19 2001. “Systematic Genetic Analysis with Ordered Arrays of Yeast Deletion Mutants.”  
20 *Science* 294 (5550): 2364–68. doi:10.1126/science.1065810.
- 21 Uemura, T, and M Tanagida. 1986. “Mitotic Spindle Pulls but Fails to Separate  
22 Chromosomes in Type II DNA Topoisomerase Mutants: Uncoordinated Mitosis.” *The*  
23 *EMBO Journal* 5 (5): 1003–10.
- 24 Uemura, T, and M Yanagida. 1984. “Isolation of Type I and II DNA Topoisomerase Mutants  
25 from Fission Yeast: Single and Double Mutants Show Different Phenotypes in Cell  
26 Growth and Chromatin Organization.” *The EMBO Journal* 3 (8): 1737–44.
- 27 Vos, Seychelle M, Elsa M Tretter, Bryan H Schmidt, and James M Berger. 2011. “All  
28 Tangled up: How Cells Direct, Manage and Exploit Topoisomerase Function.” *Nature*  
29 *Reviews. Molecular Cell Biology* 12 (12). Nature Publishing Group: 827–41.  
30 doi:10.1038/nrm3228.
- 31 Wagih, Omar, Matej Usaj, Anastasia Baryshnikova, Benjamin VanderSluis, Elena Kuzmin,  
32 Michael Costanzo, Chad L Myers, Brenda J Andrews, Charles M Boone, and Leopold  
33 Parts. 2013. “SGAtools: One-Stop Analysis and Visualization of Array-Based Genetic  
34 Interaction Screens.” *Nucleic Acids Research* 41 (Web Server issue): W591-6.  
35 doi:10.1093/nar/gkt400.
- 36 Wheatley, S P, C B O’Connell, and Y I Wang. 1998. “Inhibition of Chromosomal Separation  
37 Provides Insights into Cleavage Furrow Stimulation in Cultured Epithelial Cells.”  
38 *Molecular Biology of the Cell* 9 (8): 2173–84.
- 39  
40

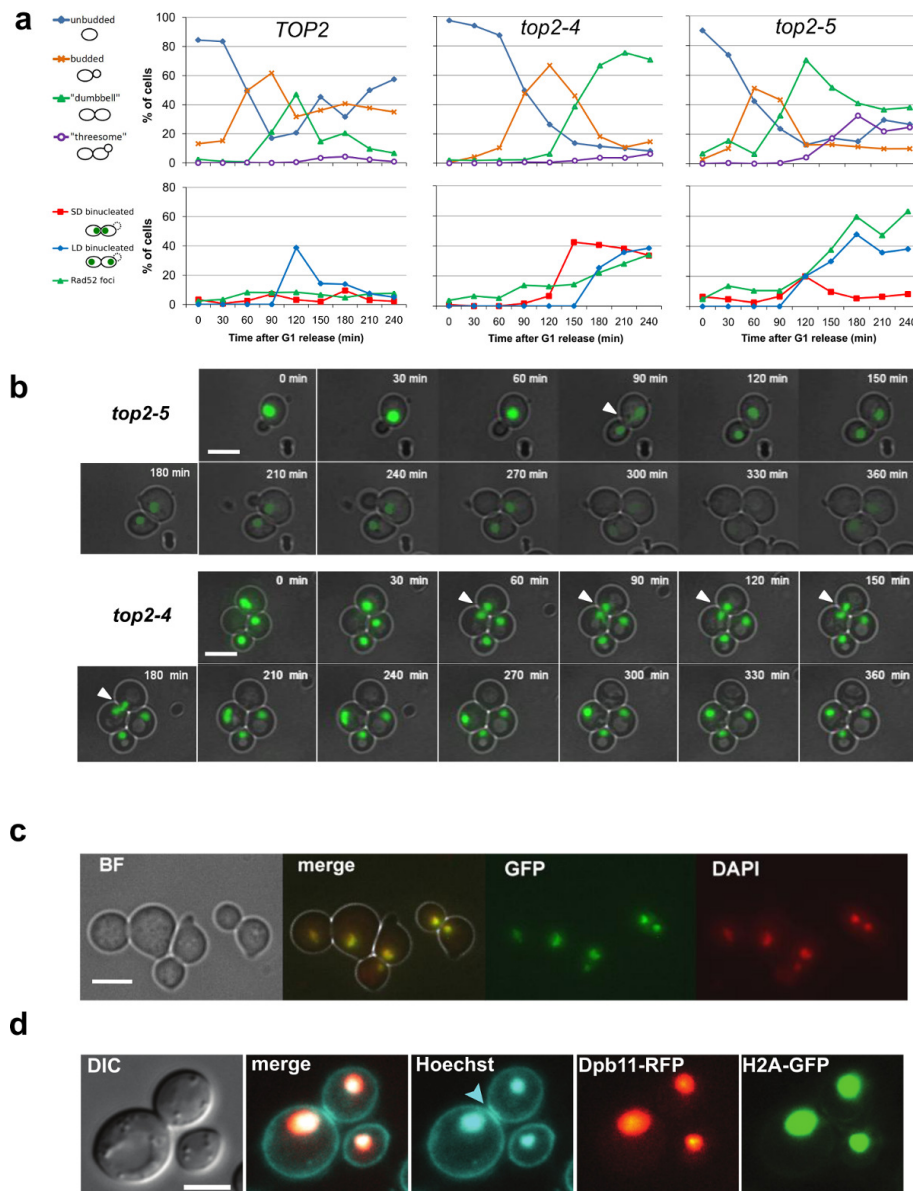

1

2 **Figure 1. Anaphase bridges in *top2-5* are quickly split apart at anaphase.** (a) *HTA2-GFP Rad52-RedStar2*  
3 yeast cells carrying different alleles of the *TOP2* gene (wild type *TOP2* and thermosensitive alleles *top2-4* and  
4 *top2-5*) were synchronized in G1 at the permissive temperature (25°C) and then released into a synchronous cell  
5 cycle at 37°C for 4 h. Samples were taken every 30' and directly analysed by fluorescence microscopy. Upper  
6 charts depict the budding pattern of the population. Lower charts depict the percentage of cells with histone-  
7 labelled split nuclear masses that either remained at a short distance ( $\leq 2 \mu\text{m}$ ) from one another (“SD  
8 binucleated”) or were separated by a longer distance (“LD binucleated”). Percentage of cells with at least one  
9 Rad52 focus is also included. (b) *HTA2-GFP* cells carrying the *top2-ts* alleles were grown at 25°C, concentrated  
10 to  $\text{OD}_{600}=3$ , spread onto YPD agarose patches and filmed under the microscope at 37°C for 6 hours, taking  
11 images every 30'. Representative cells are shown. White filled triangles point to chromatin bridges visible with  
12 H2A-GFP. (c) *HTA2-GFP top2-4* after 4 hour at 37°C in liquid cultures showing a perfect colocalization of  
13 H2A-GFP and DAPI staining. (d) *HTA2-GFP Dpb11-γEmRFP top2-5* cells were grown to exponential phase in  
14 synthetic complete medium containing 100  $\mu\text{g/ml}$  adenine before shifting to 37°C for 4h. Samples were taken  
15 every 30' and further stained for 15' with 5  $\mu\text{g/ml}$  Hoechst 33258 to visualize the plasma membrane. Since we  
16 observed no delay in anaphase for *top2-5* (panels a and b), we pooled data from 150'-240' to analyze LDB cells  
17 (131 out of 951 cells). The blue arrowhead indicates abscission. Scale bars correspond to 5  $\mu\text{m}$ . BF, bright field.  
18 DIC, differential interference contrast.

19

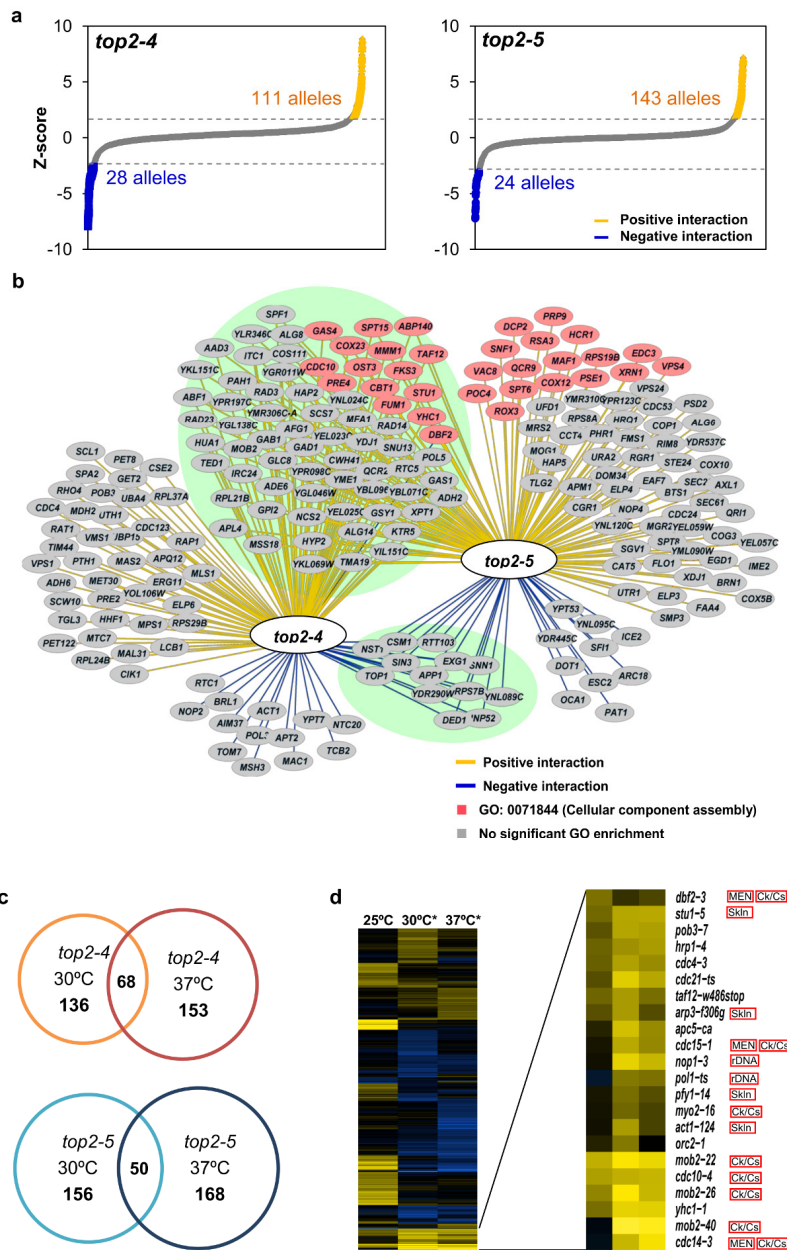

**Figure 2. SGA analyses identify the Mitotic Exit Network (MEN) as deleterious enhancers of Top2 downregulation.** (a) The z-scores of the genetic interactions detected at permissive temperature (steady growth at 25°C) are plotted. The *top2-ts* arrays of mutants were compared to the *TOP2* arrays as a control. 5553 alleles were screened in total. Positive and negative genetic interactions that meet the cutoffs ( $>2$  or  $<-2$ ) are indicated. (b) Network of the genes that interact with *top2-4* and *top2-5*. Green background encircles the 84 shared genes between the two *top2-ts*. Pink nodes indicate the positive interaction between *top2-5* and genes involved in the aggregation and bonding of cellular components (GO: 0071844). (c) The numbers of genetic interactions identified during steady growth at 30°C and after 6h incubation at 37°C are shown. Reddish circles, positive interactions; bluish circles, negative interactions. (d) Heatmap of *top2-5* SGA scores (those with  $p < 0.05$ ). Red, positive interactions; green, negative interactions; black, no interaction. The 25°C column represents the z-score obtained comparing *top2-5* versus *TOP2* at 25°C, whereas the 30°C and 37°Cx6h columns compare *top2-5* at these temperature regimes versus *top2-5* at 25°C. MEN, mitotic exit network; Ck/Cs, Cytokinesis/Cell separation; Skln, cytoskeleton; rDNA, ribosomal DNA metabolism.

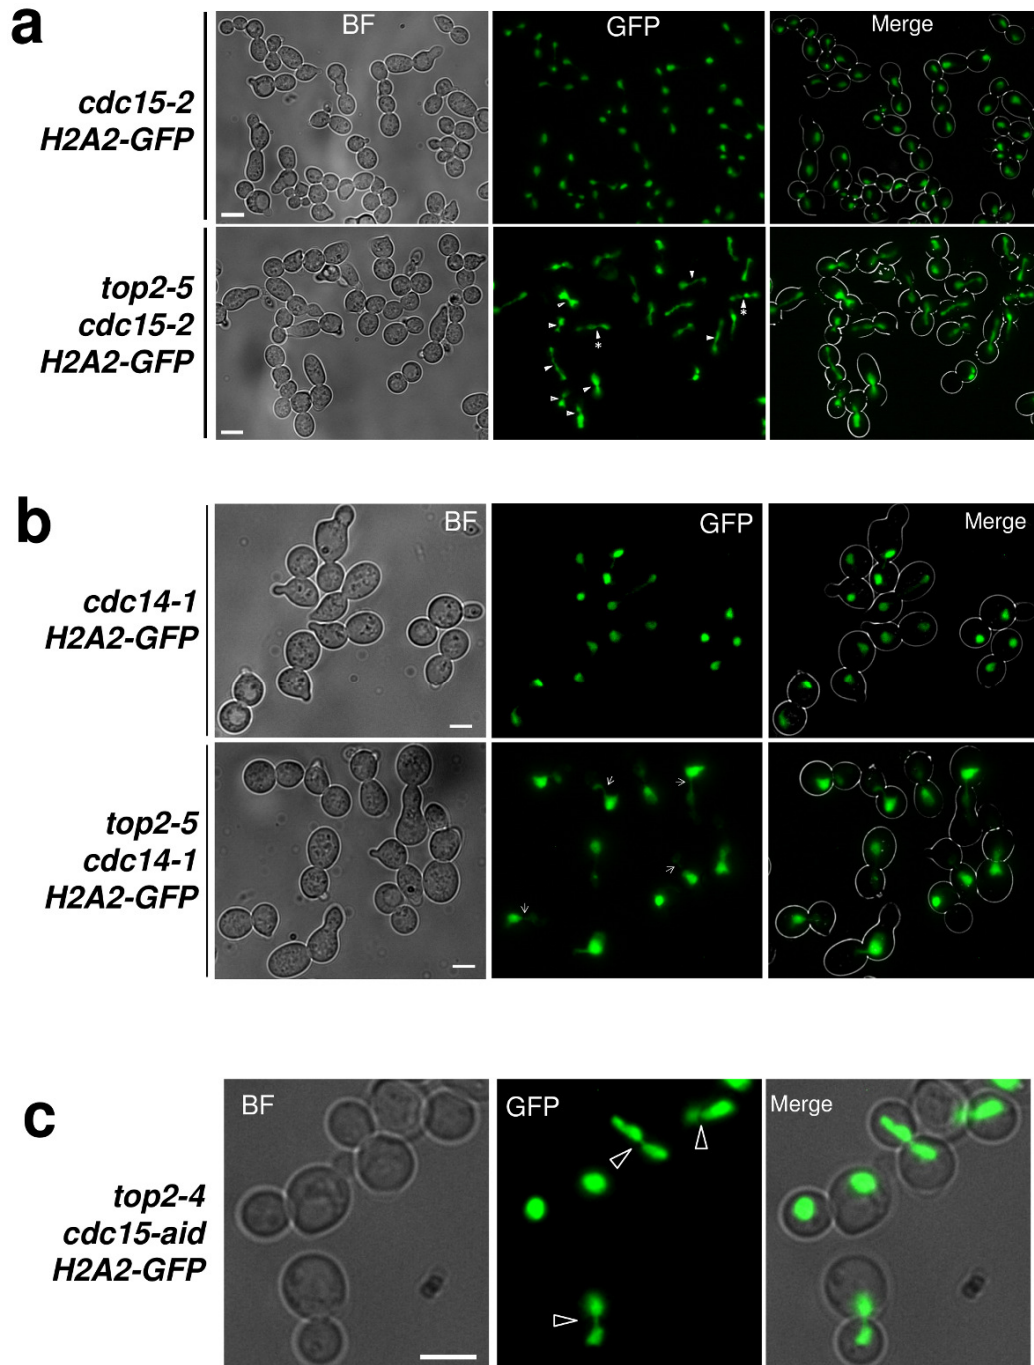

1

2

3

4

5

6

7

8

9

10

11

**Figure 3. The Mitotic Exit Network (MEN) destabilizes top2-mediated chromatin anaphase bridges.** (a) The *cdc15-2 HTA2-GFP* and *top2-5 cdc15-2 HTA2-GFP* strains were synchronized in G1 at the permissive temperature (25°C) and then released into a synchronous cell cycle at 37°C for 4 h. Samples were taken at the end of the experiment and analysed by fluorescence microscopy. (b) The *cdc14-1 HTA2-GFP* and *top2-5 cdc14-1 HTA2-GFP* strains were treated as in panel A. (c) The *top2-4 cdc15-aid HTA2-GFP* strain was synchronized in G1 at 25°C and then released at 37°C in the presence of 1 mM of the auxin indolacetic acid (IAA) for 3 h. Scale bars correspond to 5 µm. BF, bright field. Hollow arrowheads point to examples of short-distance anaphase bridges. Filled arrowheads point to examples of long-distance anaphase bridges (with an asterisk to highlight the complex strung chromatin bridges). All arrowheads point exactly at the bud neck.

1 **Table 1. Significant biological processes that genetically interact with the *top2-ts* at different**  
 2 **downregulating regimes.**

| SGA group <sup>1</sup>                                           | Gene Ontology <sup>2</sup>                                                                                  | p-value <sup>3</sup> |
|------------------------------------------------------------------|-------------------------------------------------------------------------------------------------------------|----------------------|
| <i>top2-4</i> 30°C<br>positive interactions                      | Carbohydrate biosynthetic process (GO:0016051)                                                              | 0.04323              |
| <i>top2-4</i> 37°C 6h<br>positive interactions                   | Anaphase-promoting complex-dependent proteasomal ubiquitin-dependent protein catabolic process (GO:0031145) | 0.00681              |
|                                                                  | Cell division (GO:0051301)                                                                                  | 0.00706              |
| <i>top2-4</i> 37°C 6h<br>negative interactions                   | Macroautophagy (GO:0034262)                                                                                 | 0.03361              |
| <i>top2-5</i> 30°C<br>negative interactions                      | Macromolecular complex subunit organization (GO:0043933)                                                    | 0.00115              |
|                                                                  | Organelle assembly (GO:0070925)                                                                             | 0.04773              |
| <i>top2-5</i> 37°C 6h<br>positive interactions                   | Cell division (GO:0051301)                                                                                  | 1.49E-05             |
|                                                                  | Mitotic cell cycle process (GO:1903047)                                                                     | 0.00017              |
|                                                                  | Mitotic cell cycle (GO:0000278)                                                                             | 0.00033              |
|                                                                  | Mitotic nuclear division (GO:0007067)                                                                       | 0.00035              |
|                                                                  | Mitotic cell cycle phase transition (GO:0044772)                                                            | 0.0006               |
|                                                                  | Cell cycle phase transition (GO:0044770)                                                                    | 0.00068              |
|                                                                  | Cell separation after cytokinesis (GO:0000920)                                                              | 0.02562              |
|                                                                  | Nuclear division (GO:0000280)                                                                               | 0.03884              |
| <i>top2-5</i> 37°C 6h<br>negative interactions                   | Regulation of cell division (GO:0051302)                                                                    | 0.04929              |
|                                                                  | Macroautophagy (GO:0034262)                                                                                 | 0.00048              |
|                                                                  | Cellular respiration (GO:0045333)                                                                           | 0.00067              |
|                                                                  | Oxidative phosphorylation (GO:0006119)                                                                      | 0.00238              |
|                                                                  | Generation of precursor metabolites and energy (GO:0006091)                                                 | 0.00301              |
|                                                                  | Phosphorylation (GO:0016310)                                                                                | 0.01924              |
|                                                                  | Autophagy (GO:0006914)                                                                                      | 0.02062              |
|                                                                  | Homoserine metabolic process (GO:0009092)                                                                   | 0.02391              |
| Sister chromatid biorientation (GO:0031134)                      | 0.02391                                                                                                     |                      |
| Energy derivation by oxidation of organic compounds (GO:0015980) | 0.04017                                                                                                     |                      |

3  
 4 <sup>1</sup> The corresponding *top2-ts* double mutant arrays were grown at 25°C x 2d, 30°C x 2d and 6h x 37°C + 25°C x  
 5 2d. The genetic interactions shown refer to the comparison between the downregulating temperature regimes  
 6 and steady growth at 25°C.

7 <sup>2</sup> Gene Ontology (GO) enrichment analyses were done using the Generic Gene Ontology Term Finder  
 8 (<http://go.princeton.edu/cgi-bin/GOTermFinder>). GO terms that contained more than 1500 genes were  
 9 discarded, as they are usually too general. Similarly, redundant GO terms with fewer than 10 genes were  
 10 discarded as well.

11 <sup>3</sup> P-values were computed using a hypergeometric distribution, and adjusted with the Bonferroni  
 12 correction.
